# Supplementary material
Source: publisher site journal article supplement (http://static.cambridge.org/content/id/urn:cambridge.org:id:article:S0016756819001353/resource/name/S0016756819001353supp001.doc)
Supplement: Supplementary file 1 [file S0016756819001353supp001.doc]

Table S1 Analytical results for the trace element (in ppm) of the international reference materials and replicate samples

| Analysis No. | Blank | AGV-2 | AGV-2* | BHVO-2 | BHVO-2* | BCR-2 | BCR-2* | RGM-1 | RGM-1* | GSR-1 | GSR-1* |
| --- | --- | --- | --- | --- | --- | --- | --- | --- | --- | --- | --- |
| Li | 0.0207 | 9.64 | 11.0 | 4.05 | 4.80 | 8.48 | 9.00 | 56.2 | 57.0 | 135 | 131 |
| Be | 0.0050 | 2.10 | 2.30 | 1.01 | 1.00 | 2.13 | 1.60 | 2.30 | 2.37 | 12.3 | 12.4 |
| Sc | 0.1855 | 12.9 | 13.0 | 32.1 | 32.0 | 32.5 | 33.0 | 5.12 | 4.40 | 6.00 | 6.10 |
| V | 0.4565 | 120 | 120 | 322 | 317 | 419 | 416 | 10.7 | 13.0 | 20.2 | 24.0 |
| Cr | 0.1826 | 14.9 | 17.0 | 287 | 280 | 15.1 | 18.0 | 5.03 | 5.74 | 1.72 | 1.45 |
| Co | 0.0128 | 15.7 | 16.0 | 45.6 | 45.0 | 37.3 | 37.0 | 1.97 | 2.00 | 2.88 | 3.40 |
| Ni | 0.1020 | 18.2 | 20.0 | 122 | 119 | 11.8 | 13.0 | 4.54 | 4.40 | 1.19 | 0.98 |
| Cu | 0.0410 | 46.3 | 53.0 | 139 | 127 | 15.9 | 21.0 | 9.43 | 11.6 | 1.66 | 2.87 |
| Zn | 1.4637 | 85.2 | 86.0 | 99.5 | 103 | 126 | 127 | 34.7 | 32.0 | 28.6 | 25.0 |
| Ga | 0.0242 | 20.4 | 20.0 | 21.5 | 21.7 | 21.8 | 23.0 | 16.3 | 15.0 | 18.9 | 19.0 |
| Rb | 0.0332 | 70.3 | 66.3 | 8.25 | 9.11 | 41.3 | 46.9 | 153 | 150 | 466 | 466 |
| Sr | 0.0900 | 661 | 661 | 401 | 396 | 336 | 340 | 106 | 110 | 109 | 106 |
| Y | 0.0129 | 19.4 | 20.0 | 25.6 | 26.0 | 34.9 | 37.0 | 22.6 | 25.0 | 78.4 | 67.6 |
| Zr | 0.0730 | 230 | 230 | 170 | 172 | 183 | 184 | 224 | 220 | 185 | 167 |
| Nb | 0.0148 | 13.4 | 14.5 | 17.7 | 18.1 | 11.8 | 12.6 | 8.59 | 8.90 | 46.5 | 43.5 |
| Cs | 0.0136 | 1.18 | 1.16 | 0.10 | 0.10 | 1.18 | 1.10 | 10.3 | 9.60 | 37.7 | 38.4 |
| Ba | 0.3149 | 1128 | 1130 | 117 | 131 | 685 | 677 | 835 | 810 | 330 | 343 |
| La | 0.0113 | 41.5 | 37.9 | 14.2 | 15.2 | 23.0 | 24.9 | 21.2 | 24.0 | 57.2 | 54.0 |
| Ce | 0.0140 | 69.7 | 68.6 | 38.1 | 37.5 | 52.8 | 52.9 | 46.8 | 47.0 | 107 | 108 |
| Pr | 0.0092 | 8.15 | 7.84 | 5.40 | 5.35 | 6.83 | 6.70 | 5.32 | 5.36 | 12.3 | 12.7 |
| Nd | 0.0094 | 31.4 | 30.5 | 25.3 | 24.5 | 29.0 | 28.7 | 19.6 | 19.0 | 44.6 | 47.0 |
| Sm | 0.0106 | 5.65 | 5.49 | 6.25 | 6.07 | 6.64 | 6.58 | 4.07 | 4.30 | 9.55 | 9.70 |
| Eu | 0.0095 | 1.60 | 1.54 | 2.01 | 2.07 | 1.98 | 1.96 | 0.70 | 0.66 | 0.79 | 0.85 |
| Gd | 0.0087 | 4.76 | 4.52 | 6.40 | 6.24 | 6.72 | 6.75 | 3.83 | 3.70 | 8.84 | 9.30 |
| Tb | 0.0090 | 0.67 | 0.64 | 0.99 | 0.92 | 1.09 | 1.07 | 0.62 | 0.66 | 1.59 | 1.65 |
| Dy | 0.0093 | 3.60 | 3.47 | 5.57 | 5.31 | 6.55 | 6.41 | 3.78 | 4.10 | 10.0 | 10.2 |
| Ho | 0.0081 | 0.67 | 0.65 | 0.98 | 0.98 | 1.31 | 1.28 | 0.77 | 0.82 | 2.05 | 2.05 |
| Er | 0.0108 | 1.83 | 1.81 | 2.63 | 2.54 | 3.67 | 3.66 | 2.30 | 2.35 | 6.43 | 6.50 |
| Tm | 0.0107 | 0.25 | 0.26 | 0.34 | 0.33 | 0.54 | 0.54 | 0.35 | 0.37 | 1.07 | 1.06 |
| Yb | 0.0104 | 1.63 | 1.62 | 2.02 | 2.00 | 3.39 | 3.38 | 2.51 | 2.60 | 7.45 | 7.40 |
| Lu | 0.0094 | 0.25 | 0.25 | 0.28 | 0.27 | 0.52 | 0.50 | 0.38 | 0.40 | 1.14 | 1.15 |
| Hf | 0.0107 | 5.17 | 5.00 | 4.42 | 4.36 | 4.84 | 4.90 | 5.91 | 6.20 | 6.00 | 5.86 |
| Ta | 0.0075 | 0.86 | 0.87 | 1.22 | 1.14 | 0.80 | 0.78 | 0.94 | 0.95 | 7.12 | 7.20 |
| Pb | 0.0301 | 12.5 | 13.2 | 1.79 | 2.09 | 10.2 | 11.0 | 22.0 | 23.6 | 30.5 | 31.0 |
| Th | 0.0093 | 5.76 | 6.10 | 1.17 | 1.22 | 5.60 | 5.70 | 13.5 | 15.1 | 56.4 | 54.0 |
| U | 0.0087 | 1.94 | 1.86 | 0.43 | 0.40 | 1.74 | 1.69 | 5.74 | 5.80 | 18.9 | 19.0 |

* Replicate analyses at the State Key Laboratory of Geological Processes and Mineral Resources (GPMR), China University of Geosciences (Wuhan).

Table S2 Trace element compositions ((in ppm) of magmatic zircons from the Group 1 mafic rocks

| Sample No. | 01 | 02 | 03 | 04 | 06 | 07 | 09 | 10 | 11 | 13 | 14 | 16 | 18 | 21 | 23 | 24 |
| --- | --- | --- | --- | --- | --- | --- | --- | --- | --- | --- | --- | --- | --- | --- | --- | --- |
| La | 0.06 | 0.05 | 0.01 | 0.02 | 0.00 | 0.00 | 0.06 | 0.16 | 0.07 | 0.00 | 1.01 | 0.00 | 0.03 | 0.05 | 0.01 | 0.14 |
| Ce | 5.77 | 6.66 | 8.45 | 9.78 | 10.23 | 3.28 | 7.22 | 15.10 | 5.26 | 2.25 | 30.07 | 0.80 | 8.68 | 2.75 | 4.82 | 8.66 |
| Pr | 0.03 | 0.05 | 0.01 | 0.04 | 0.03 | 0.01 | 0.10 | 1.13 | 0.12 | 0.00 | 1.23 | 0.01 | 0.04 | 0.09 | 0.05 | 0.06 |
| Nd | 0.77 | 0.77 | 0.38 | 0.44 | 0.28 | 0.36 | 1.26 | 15.34 | 1.71 | 0.01 | 19.29 | 0.20 | 0.60 | 0.88 | 0.57 | 1.10 |
| Sm | 1.56 | 1.38 | 2.01 | 1.39 | 1.64 | 1.30 | 3.04 | 25.14 | 4.44 | 0.71 | 35.36 | 0.88 | 2.50 | 2.04 | 1.04 | 2.28 |
| Eu | 1.00 | 1.01 | 0.76 | 0.52 | 0.96 | 1.15 | 2.50 | 6.23 | 0.77 | 1.21 | 1.90 | 0.84 | 1.46 | 1.30 | 0.86 | 1.06 |
| Gd | 8.61 | 14.23 | 12.21 | 6.44 | 7.62 | 14.41 | 30.90 | 108.67 | 25.25 | 11.40 | 174.15 | 7.82 | 14.66 | 8.52 | 7.81 | 15.43 |
| Tb | 3.02 | 4.48 | 4.32 | 2.85 | 3.03 | 7.27 | 13.25 | 33.51 | 8.55 | 5.37 | 55.33 | 2.82 | 4.90 | 3.49 | 3.06 | 5.16 |
| Dy | 41.87 | 56.73 | 57.53 | 33.47 | 41.42 | 121.83 | 248.14 | 391.90 | 97.30 | 91.36 | 647.64 | 47.57 | 59.34 | 56.22 | 37.19 | 61.83 |
| Ho | 17.41 | 21.96 | 19.27 | 12.38 | 15.53 | 57.18 | 116.97 | 127.26 | 36.33 | 43.60 | 216.89 | 20.52 | 20.50 | 25.86 | 12.61 | 22.71 |
| Er | 99.69 | 116.66 | 94.55 | 63.66 | 90.41 | 340.91 | 714.17 | 574.72 | 172.94 | 280.68 | 947.64 | 127.58 | 102.09 | 158.95 | 63.12 | 105.54 |
| Tm | 23.93 | 26.42 | 21.28 | 13.87 | 20.60 | 82.44 | 170.15 | 109.45 | 35.16 | 72.77 | 174.79 | 32.55 | 21.92 | 39.22 | 12.79 | 22.27 |
| Yb | 321.18 | 321.38 | 242.01 | 165.10 | 268.39 | 1132.23 | 2241.46 | 1121.56 | 375.83 | 1061.87 | 1695.56 | 426.20 | 257.34 | 542.26 | 144.56 | 263.60 |
| Lu | 67.32 | 64.05 | 45.82 | 30.80 | 51.11 | 273.44 | 465.32 | 187.13 | 66.79 | 273.92 | 274.06 | 90.61 | 50.60 | 118.93 | 29.34 | 49.27 |
| Y | 610.93 | 824.58 | 701.45 | 445.94 | 552.51 | 2093.29 | 4428.27 | 4080.68 | 1263.15 | 1643.34 | 6864.40 | 806.76 | 773.83 | 982.68 | 470.11 | 805.95 |
| Eu/Eu* | 0.66 | 0.44 | 0.36 | 0.44 | 0.69 | 0.50 | 0.50 | 0.31 | 0.17 | 0.69 | 0.06 | 0.66 | 0.57 | 0.82 | 0.65 | 0.40 |

Table S3 Trace element compositions ((in ppm) of zircons from the host granitic intrusion (after Liu et al., 2012)

| Sample No. | 01 | 02 | 03 | 04 | 05 |
| --- | --- | --- | --- | --- | --- |
| La | 0.52 | 0.02 | 0.02 | 0.03 | 0.03 |
| Ce | 12.95 | 6.19 | 4.85 | 4.71 | 10.99 |
| Pr | 0.68 | 0.08 | 0.33 | 0.37 | 0.04 |
| Nd | 6.10 | 1.23 | 4.84 | 5.99 | 1.08 |
| Sm | 9.49 | 3.31 | 10.26 | 12.21 | 2.79 |
| Eu | 0.72 | 0.22 | 1.45 | 0.88 | 0.63 |
| Gd | 46.47 | 21.49 | 58.91 | 63.14 | 16.63 |
| Tb | 15.47 | 7.67 | 20.16 | 20.54 | 5.82 |
| Dy | 179.27 | 96.72 | 229.01 | 234.16 | 72.17 |
| Ho | 65.53 | 36.43 | 83.14 | 84.35 | 28.27 |
| Er | 274.01 | 159.95 | 346.06 | 352.01 | 132.85 |
| Tm | 53.48 | 32.79 | 66.01 | 69.13 | 29.23 |
| Yb | 464.79 | 299.36 | 566.50 | 599.94 | 292.66 |
| Lu | 84.89 | 55.78 | 103.46 | 106.60 | 59.73 |
| Y | 1807.20 | 1045.30 | 2262.63 | 2372.04 | 884.20 |
| Eu/Eu* | 0.09 | 0.06 | 0.14 | 0.08 | 0.22 |

Table S4 Trace element compositions ((in ppm; after Liu et al., 2012) and the calculated oxygen fugacity (*f*O2) of magmatic zircons from the Group 2 mafic rocks

| Sample No. | 01 | 02 | 03 | 04 | 05 | 06 | 07 | 08 | 09 | 10 | 11 | 12 | 13 | 14 | 15 |
| --- | --- | --- | --- | --- | --- | --- | --- | --- | --- | --- | --- | --- | --- | --- | --- |
| La | 0.00 | 0.02 | 0.04 | 0.01 | 0.00 | 0.00 | 0.05 | 0.04 | 0.00 | 0.00 | 0.01 | 0.00 | 0.07 | 0.02 | 0.07 |
| Ce | 1.83 | 2.32 | 2.80 | 1.81 | 1.89 | 1.61 | 1.76 | 1.88 | 2.77 | 2.48 | 1.67 | 1.77 | 3.79 | 2.70 | 3.40 |
| Pr | 0.05 | 0.13 | 0.26 | 0.06 | 0.03 | 0.02 | 0.07 | 0.06 | 0.19 | 0.24 | 0.04 | 0.02 | 0.26 | 0.11 | 0.39 |
| Nd | 1.10 | 2.83 | 3.99 | 0.85 | 0.64 | 0.77 | 0.74 | 1.00 | 3.46 | 4.12 | 0.99 | 0.58 | 4.28 | 1.93 | 6.54 |
| Sm | 2.28 | 5.33 | 7.26 | 1.63 | 1.32 | 2.28 | 1.44 | 2.76 | 6.95 | 6.96 | 1.58 | 1.64 | 8.45 | 4.16 | 8.62 |
| Eu | 0.17 | 0.36 | 0.60 | 0.12 | 0.10 | 0.15 | 0.18 | 0.19 | 0.52 | 0.45 | 0.14 | 0.11 | 0.47 | 0.27 | 0.64 |
| Gd | 14.33 | 27.32 | 33.10 | 9.81 | 10.59 | 12.60 | 9.40 | 13.20 | 35.68 | 30.81 | 11.76 | 10.03 | 44.03 | 22.23 | 46.16 |
| Tb | 4.93 | 8.71 | 11.14 | 3.36 | 3.68 | 4.26 | 3.34 | 4.62 | 11.70 | 9.28 | 4.68 | 3.45 | 14.74 | 7.45 | 15.68 |
| Dy | 62.18 | 101.01 | 125.32 | 41.75 | 44.05 | 52.01 | 40.67 | 57.72 | 132.91 | 108.28 | 58.40 | 45.25 | 172.16 | 87.93 | 196.13 |
| Ho | 25.13 | 36.72 | 47.86 | 16.21 | 17.11 | 20.01 | 16.14 | 22.28 | 48.41 | 40.17 | 23.60 | 18.20 | 64.05 | 33.53 | 78.59 |
| Er | 114.32 | 156.23 | 206.26 | 74.19 | 78.77 | 88.44 | 73.26 | 100.78 | 205.58 | 174.00 | 110.33 | 82.81 | 278.75 | 147.31 | 354.20 |
| Tm | 24.76 | 31.25 | 40.85 | 15.70 | 16.57 | 18.31 | 15.24 | 21.17 | 40.72 | 34.74 | 23.45 | 17.51 | 55.50 | 29.50 | 71.04 |
| Yb | 232.77 | 279.11 | 361.16 | 145.22 | 155.93 | 169.59 | 144.26 | 195.29 | 352.81 | 312.64 | 219.93 | 166.10 | 492.94 | 268.20 | 631.48 |
| Lu | 46.14 | 50.85 | 65.98 | 27.86 | 29.47 | 31.61 | 27.18 | 38.01 | 63.11 | 58.83 | 43.07 | 31.50 | 88.49 | 50.43 | 115.54 |
| Y | 769.21 | 1090.06 | 1387.23 | 494.39 | 530.75 | 597.15 | 490.29 | 673.16 | 1404.24 | 1179.39 | 726.92 | 554.33 | 1856.72 | 1002.40 | 2302.79 |
| *fO2* | -20.09 | -19.65 | -20.11 | -19.19 | -19.40 | -19.46 | -19.50 | -18.36 | -19.37 | -20.14 | -19.97 | -20.10 | -20.28 | -20.10 | -21.23 |
